# Supplementary material for: Earth-abundant WC nanoparticles as an active noble-metal-free co-catalyst for the highly boosted photocatalytic H2 production over g-C3N4 nanosheets under visible light
Source: Royal Society of Chemistry journal article supplement (doi:10.1039/c7cy00029d), 2017-01-01
Supplement: c7cy00029d1.pdf [file c7cy00029d1.pdf]

## Electronic Supplementary Information

### Earth-abundant WC nanoparticles as an active noble-metal-free cocatalyst for highly boosted photocatalytic H<sub>2</sub> production over g-C<sub>3</sub>N<sub>4</sub> nanosheets under visible light

Kelin He,<sup>a,b,c‡</sup> Jun Xie,<sup>a,b,c‡</sup> Zhuohong Yang,<sup>c</sup> Rongchen Shen,<sup>a,b,c</sup> Yueping Fang,<sup>c</sup> Song Ma,<sup>a,b,c</sup> Xiaobo Chen,<sup>d</sup>

Xin Li<sup>a,b,c\*</sup>

*a* College of Forestry and Landscape Architecture, South China Agricultural University, Guangzhou 510642, PR China.

*b* Institute of New Energy and New Materials, Key Laboratory of Energy Plants Resource and Utilization, Ministry of Agriculture, Key Laboratory of

Biomass Energy of Guangdong Regular Higher Education Institutions, South China Agricultural University, Guangzhou 510642, PR China.

*c* College of Materials and Energy, South China Agricultural University, Guangzhou 510642, PR China.

*d* Department of Chemistry, University of Missouri – Kansas City, Kansas City, MO, 64110, USA.

E-mail: Xinliscan@yahoo.com (X. Li)

‡ Kelin He and Jun Xie contributed equally.

**Table S1.** Pore structure parameter of g-C<sub>3</sub>N<sub>4</sub> and CW15.

| Photocatalysts                  | BET specific surface area<br>(m <sup>2</sup> g <sup>-1</sup> ) | Mean pore<br>diameter (nm) | Pore volume<br>(cm <sup>3</sup> g <sup>-1</sup> ) |
|---------------------------------|----------------------------------------------------------------|----------------------------|---------------------------------------------------|
| g-C <sub>3</sub> N <sub>4</sub> | 9.47                                                           | 27.65                      | 0.095                                             |
| CW15                            | 10.74                                                          | 28.96                      | 0.099                                             |

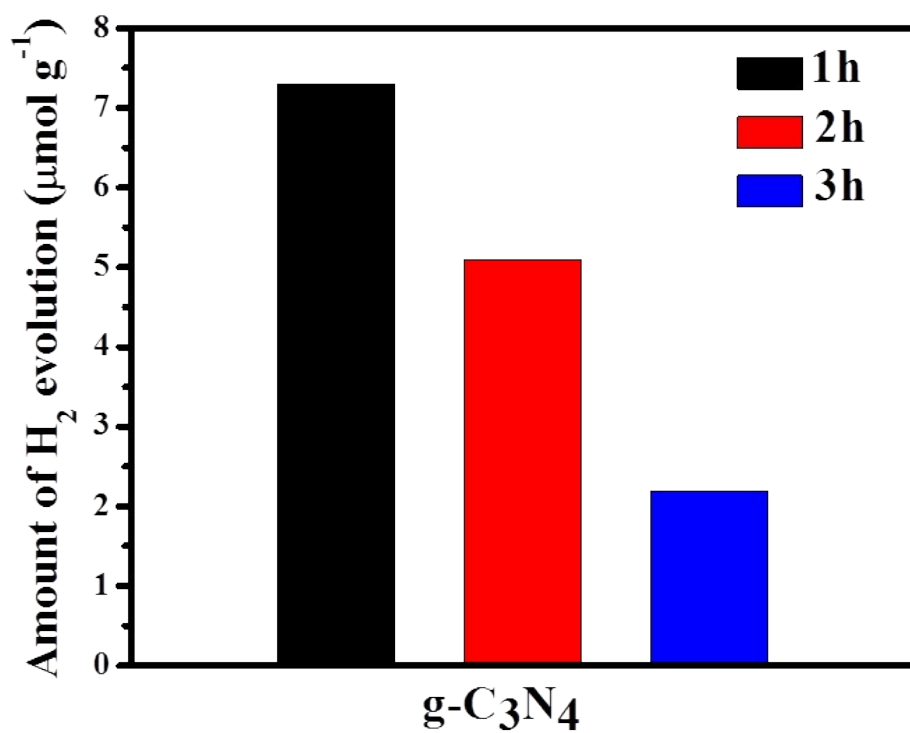

**Figure S1.** Time courses of photocatalytic H<sub>2</sub> evolution over the pure g-C<sub>3</sub>N<sub>4</sub> photocatalysts. Reaction conditions: catalyst, 0.05 g; 15 mL triethanolamine; 85 mL distilled water; light source, Xenon lamp (300 W) with a UV cut-off filter ( $\lambda \geq 420$  nm).
